# Supplementary material for: Acoustophoresis-driven particle focusing and separation with standard/inverse Chladni patterns
Source: Royal Society of Chemistry journal article supplement (doi:10.1039/d4lc00277f), 2024-01-01
Supplement: d4lc00277f5.pdf [file d4lc00277f5.pdf]

## Supporting Information

### **Acoustophoresis-driven particle focusing and separation with standard/inverse Chladni patterns**

Xiong Zhao<sup>a</sup> and Nanjing Hao <sup>\*a</sup>

*<sup>a</sup>School of Chemical Engineering and Technology, Xi'an JiaoTong University, 28 Xianning West Road, Xi'an, Shaanxi, 710049, P.R. China*

*\*Corresponding author, email address: nanjing.hao@xjtu.edu.cn*

#### **This file includes:**

Fig. S1 The photo of fabricated device with a 20 mm×20 mm×60 μm microchamber.

Fig. S2 The SEM image of 5 μm polystyrene spheres.

Fig. S3 The sinking process of 5 μm polystyrene spheres in ethanol for 2 hours.

Fig. S4 The photo of fabricated device with a 10 mm×5 mm×60 μm microchamber.

Fig. S5 The SEM image of 1 μm polystyrene spheres.

Fig. S6 The SEM image of copper powder with average diameter of 1 μm.

Fig. S7 The sinking process of 1 μm copper powder in ethanol for 20 min.

#### **Other Supplementary Materials for this manuscript include the following:**

Movie S1. The motion of 5 μm polystyrene spheres and the trajectory of coloured fluids in the 20 mm×20 mm×60 μm microchamber under the applied frequency of 5 kHz and applied voltage of 100 Vpp.

Movie S2. The motion of 5 μm polystyrene spheres and 1 μm polystyrene spheres in the 10 mm×5 mm×60 μm microchamber under the applied frequency of 3 kHz and applied voltage of 100 Vpp.

Movie S3. The motion of 1 μm copper powder in the 10 mm×5 mm×60 μm microchamber under the applied frequency of 3 kHz and applied voltage of 100 Vpp.

Movie S4. The motion of SiO<sub>2</sub> particles in the 10 mm×5 mm×60 μm microchamber

under the applied frequency of 3 kHz and applied voltage of 100 Vpp.

**Supplementary Figures:**

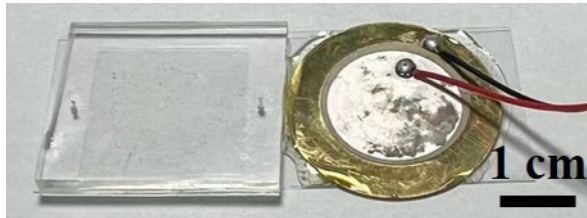

**Fig. S1** The photo of fabricated device with a 20 mm×20 mm×60  $\mu\text{m}$  microchamber.

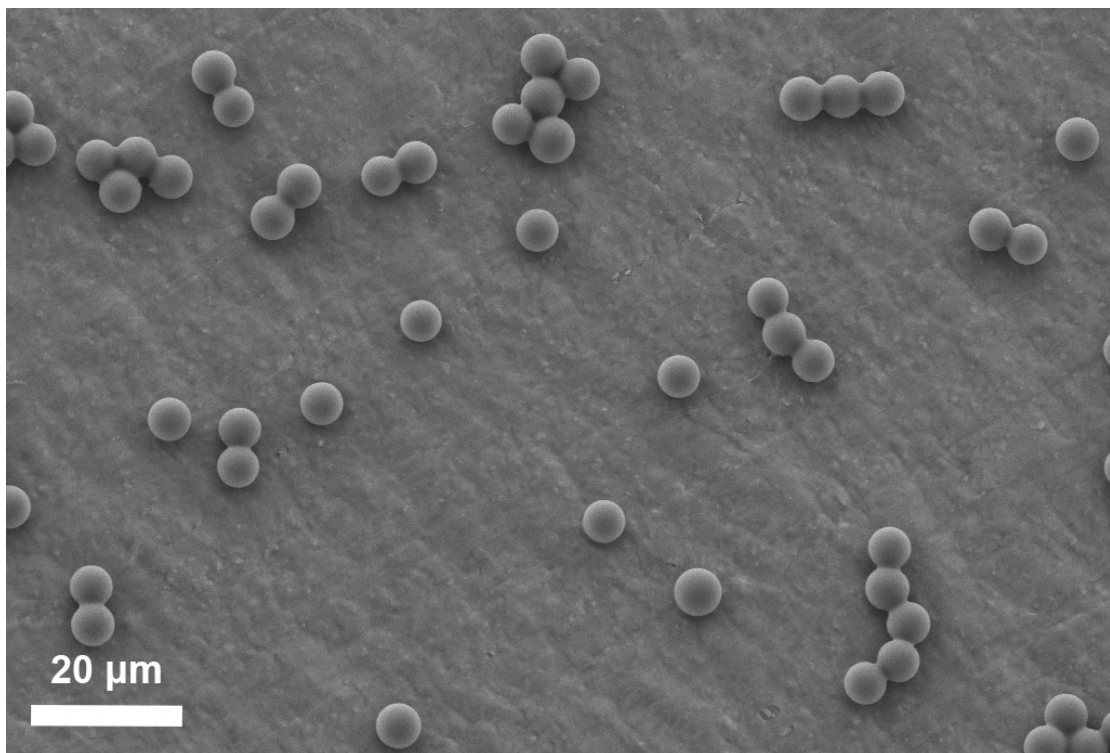

**Fig. S2** The SEM image of 5  $\mu\text{m}$  polystyrene spheres.

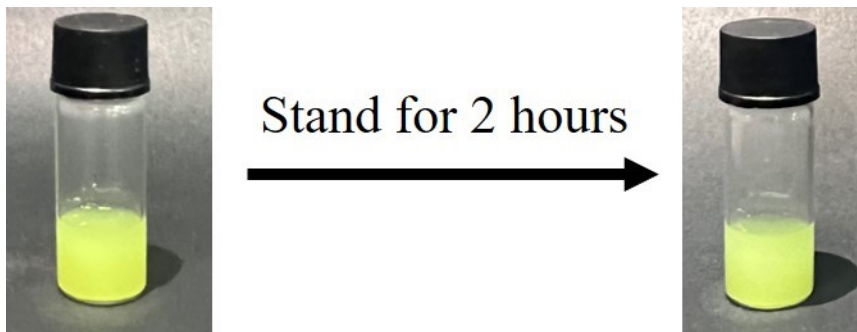

**Fig. S3** The sinking process of 5  $\mu\text{m}$  polystyrene spheres in ethanol for 2 hours.

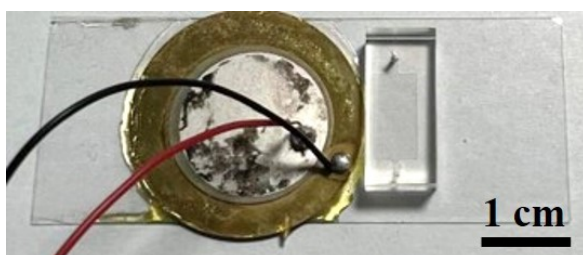

**Fig. S4** The photo of fabricated device with a 10 mm×5 mm×60  $\mu\text{m}$  microchamber.

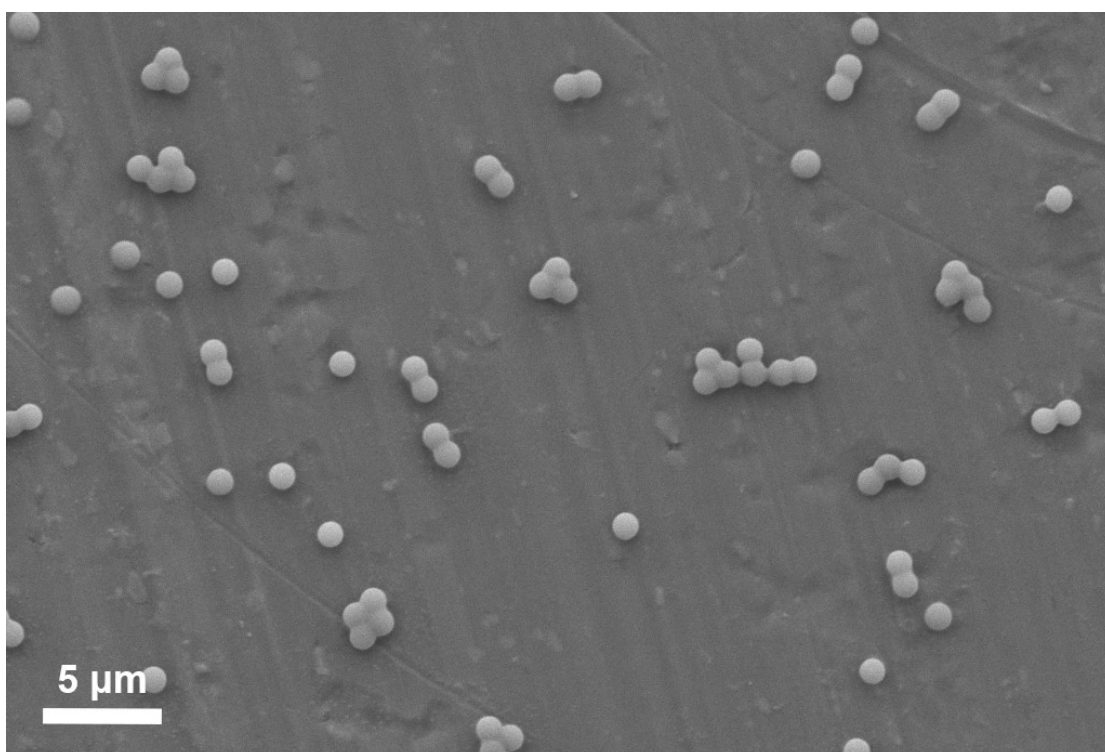

**Fig. S5** The SEM image of 1  $\mu\text{m}$  polystyrene spheres.

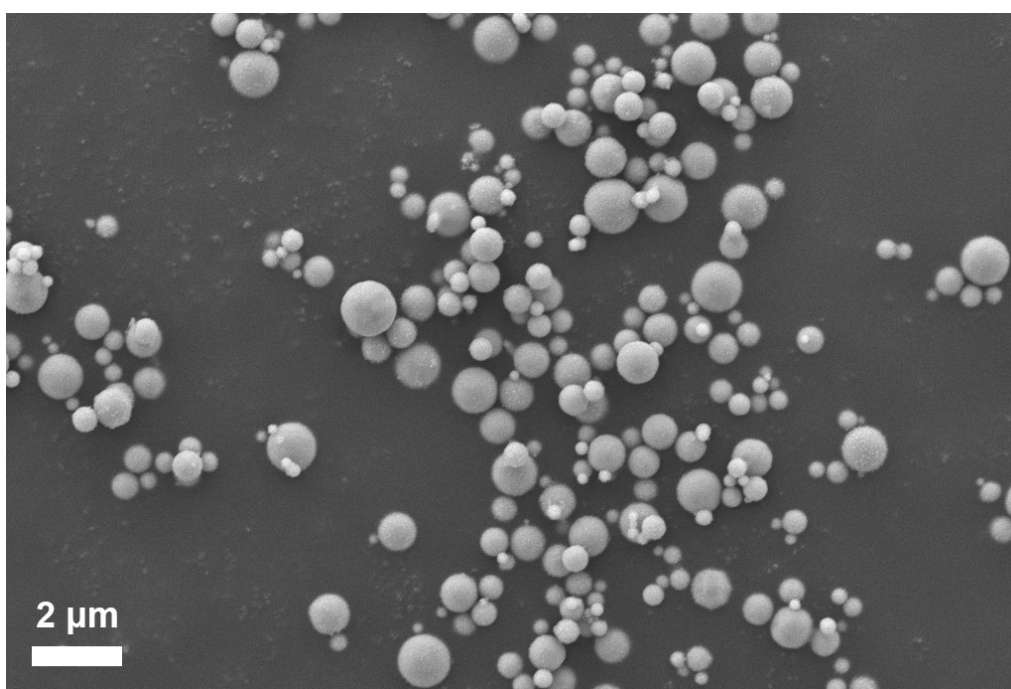

**Fig. S6** The SEM image of copper powder with average diameter of 1  $\mu\text{m}$ .

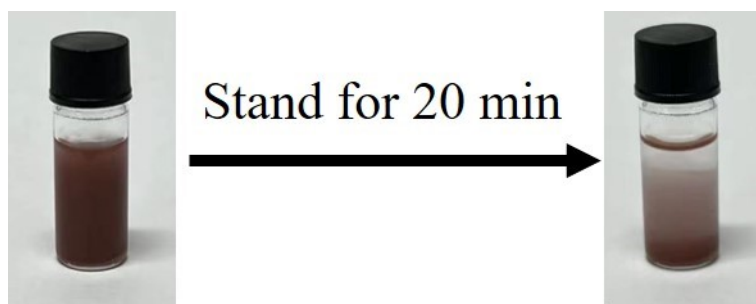

**Fig. S7** The sinking process of 1  $\mu\text{m}$  copper powder in ethanol for 20 min.
